# Supplementary material for: The discovered chimeric protein plays the cohesive role to maintain scallop byssal root structural integrity
Source: Springer Nature journal article supplement (doi:10.1038/s41598-018-35265-y), 2018-11-14
Supplement: MOESM1 [file 41598_2018_35265_MOESM1_ESM-1.pdf]

# The discovered chimeric protein plays the cohesive role to maintain scallop byssal root structural integrity

Pingping Xu<sup>1,2,+</sup>, Xiaoting Dai<sup>1,+</sup>, Dandan Wang<sup>1</sup>, Yan Miao<sup>1</sup>, Xiaokang Zhang<sup>1</sup>, Shuoshuo Wang<sup>1</sup>, Luyao Teng<sup>1</sup>, Bo Dong<sup>1,2</sup>, Zhenmin Bao<sup>1,3</sup>, Shi Wang<sup>1,2</sup>, Qianqian Lyu<sup>1,2,\*</sup>, and Weizhi Liu<sup>1,2,\*</sup>

<sup>1</sup>MOE Key Laboratory of Marine Genetics and Breeding, College of Marine Life Sciences, Ocean University of China, Qingdao, China;

<sup>2</sup>Laboratory for Marine Biology and Biotechnology, Qingdao National Laboratory for Marine Science and Technology, Qingdao, China;

<sup>3</sup>Laboratory for Marine Fisheries Science and Food Production Processes, Qingdao National Laboratory for Marine Science and Technology, Qingdao, China.

**\*corresponding.author:**

Weizhi Liu. E-mail: liuweizhi@ouc.edu.cn

Qianqian Lyu. E-mail: lqqdo@163.com

<sup>+</sup> These authors contributed equally to this work.

## Supplementary methods

**Mechanical measurements for scallop byssus.** To measure the mechanical strength of byssus, adult *C. farreri* were purchased from an aquatic farm in Qingdao; scallops adhering by scallop byssus were fixed to cages and dragged by a dynamometer. In total, 10 scallops were randomly selected for tension measurement to explore the fracture region.

Byssus detachment force was calculated as the max tension/scallop weight. Data are expressed as the means  $\pm$  S.D.

**Full length determination for *Sbp9*.** cDNA of *Sbp9* was synthesized using the SMARTer™ RACE cDNA Amplification Kit (Clontech, CA, USA) according to the protocol. The primer for 5'-RACE was TGGTAGCCTGGGTTACTGACACTTGTT and the primer for 3'-RACE was TATGGTTGGCAATCCCTACTCCCG. The products were cloned into a pMD18T vector (Takara, Kyoto, Japan). The sequence of 5'-RACE product was confirmed through Sanger sequencing and the sequence of 3'-RACE product was confirmed through Sanger sequencing and third-generation sequencing. The sequencing libraries for the third-generation sequencing were prepared with the standard protocol from PacBio. Briefly, DNA was amplified by PCR. After fragment DNA, repairing DNA damage and DNA ends, anneal sequencing primer to SMRTbell™ templates, target DNA was sequenced by Oebiotech (<http://www.oebiotech.com/>) on the Pacbio Sequel sequencing instrument to overcome the multiple repeats issues.

BLAST 2.3.1+ software was used to compare sequences from SMRT sequencing and sequences from Sanger sequencing. The consensus sequences from BLAST were analyzed by the software MEGA7 (<http://www.megasoftware.net/>) and the final sequence was acquired by correction based on the multiple sequences through insert the missing bases and/or delete the redundant bases.

**Expression profiling of EC and related genes in scallop foot and other organs/tissues.** The expression levels of EC and related genes were retrieved from the published RNA-seq datasets of *C. farreri*<sup>1</sup>, including eleven adult organs/tissues (blood, eye, foot, female gonad, gill, hepatopancreas, kidney, mantle, male gonad, striated muscle, smooth muscle) and three foot subregions (tip, middle and root). Each organ or tissue was represented by three biological replicates. The expression value was calculated using the TMM algorithm implemented in EdgeR software<sup>2</sup> and was represented as reads per kilobase per million mapped reads (RPKM). The expression levels of EC and related genes

are represented by an average RPKM of three biological replicates.

**Polyclonal antibody preparation.** Polyclonal antibody was prepared and purified by ABclonal Biotechnology (Wuhan, China). Three rabbits were injected with CBD1<sup>Sbp9</sup> as described in the methods under **Recombinant protein over-expression and purification**; the protein was dissolved in PBS and complete Freund's adjuvant in a ratio of 1:1, and the rabbits were boosted three times (at weeks 3, 6, and 9). Affinity chromatography was utilized for antibody purification.

**Evaluation of the chemical form of the Cys residues.** The amount of nonoxidized Cys residues was quantified spectrophotometrically using Ellman's reagent (5,5'-dithiobis (2-nitrobenzoic acid), DTNB), which reacts with thiol groups of free thiol to yield 2-nitro-5-mercapto-benzoic acid (TNB)<sup>3</sup>. EGFL<sub>2</sub> and EGFL<sub>4</sub> were stood overnight at ambient temperature (~ 25 °C). Then, 50 µL of 10 mM DTNB were added to 2.45 mL of 20 mM Tris-HCl pH 8.5 buffer containing ~1 mg/mL protein. The amount of thiol remaining in the reaction medium was quantified by measuring TNB absorbance at 412 nm. L-cysteine was performed as a standard and lysozyme, of which the eight Cys residues form four disulfide bonds, was performed as a negative control.

**Recombinant protein over-expression and purification.** To enhance the yield of the recombinant proteins, the codon optimization was carried out and the corresponding genes were synthesized. The CBD1 and EGFL<sub>4</sub> fragment were obtained by PCR amplification using the synthesized CBD1<sup>Sbp9</sup>-EGFL<sub>4</sub> as template. All the primers were provided in Table S6. Then the fragments were digested with restriction enzymes (*Bam*HI and *Xho*I), before they were inserted into the modified pET-32-HisTT (modified from Novagen pET-32) vector. All the recombinant constructs were verified by DNA sequence.

To over-express the recombinant interest protein, these constructs were transformed into *E. coli* BL21 (DE3) cells, which were then cultured in LB medium containing kanamycin (30 mg/L) at 37 °C. When D<sub>600</sub> reached ~ 0.6, protein over-expression was then induced using 0.2 mM IPTG at 16°C overnight. The cultures were harvested by

centrifugation (1,500 g, 30 min, 4°C) and the cells were suspended in PBS. After sonication, the resulting lysates were clarified by centrifugation at 16,000 g for 10 min.

For the CBD1<sup>Sbp9</sup>, the protein was in the insoluble cell pellet, which was washed by PBS buffer and 1 M urea, the resulting cell pellet was then solubilized in 20 mM Tris-HCl pH 8.0 binding buffer containing 5 mM imidazole, 8 M urea were purified with a Ni<sup>2+</sup>-NTA agarose and eluted with 20 mM Tris-HCl pH 8.0 elution buffer containing 500 mM imidazole, 8 M urea. CBD1<sup>Sbp9</sup> was refolded using a Sephacryl S-100 column (GE Healthcare, Chicago, Illinois, U.S.) eluted in 20 mM Tris-HCl pH 8.5. Preparation of EGFL<sub>4</sub> was similar to the CBD1<sup>Sbp9</sup> except the Ni<sup>2+</sup>-NTA was not applied.

The recombinant protein pure was evaluated by 15% SDS-PAGE (Figure S2). The protein concentration was measured by Bradford methods<sup>4</sup>.

Supplementary figures

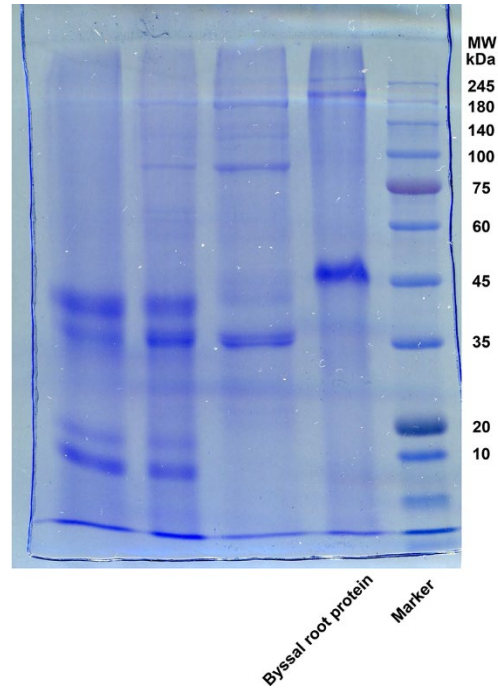

Figure S1. SDS-PAGE of extract from the scallop byssal root

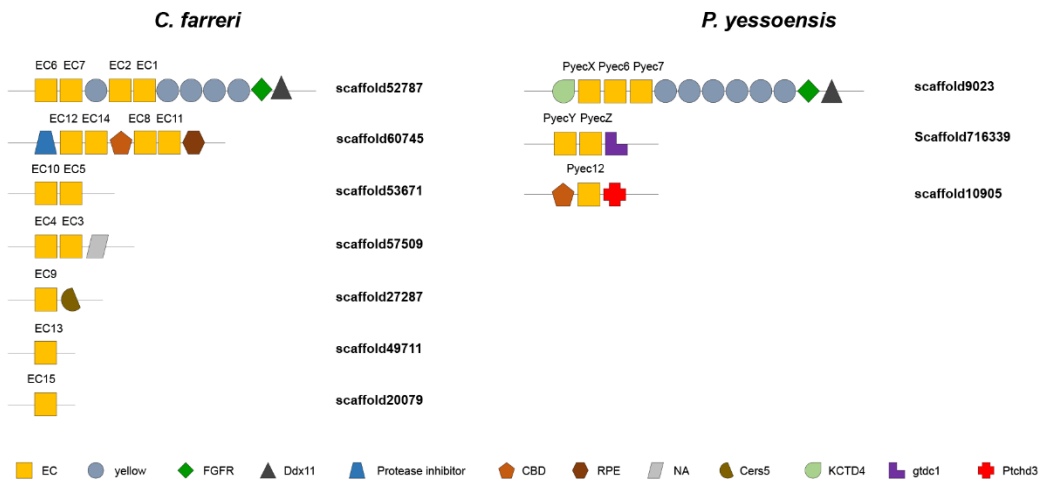

Figure S2. Genomic distribution of EC genes in scallops (*C. farreri* and *P. yessoensis*).

|           |                                         |
|-----------|-----------------------------------------|
| 79-115    | PCYDRCGPNSCEDVETTFICSCKKNMVGPNPYSREGCDV |
| 116-150   | PCGGKCIANAFNEVTNQCECKAGYKGSATTKCYI..    |
| 151-185   | PCDNKCKENAFCLESENKQCQNPYQGNPLKGCEL..    |
| 186-219   | PCGGSCPINSYCKDNKVCNEGFVGNPYKDGCDV...    |
| 220-254   | PCGGKCVFNAYCNSKDNKCYCKEGLVGNPYTRCAK..   |
| 255-289   | PCNDECRQNAAYCNKKDNKCYCNKGFQGDPRVGRK..   |
| 290-323   | PCDDRCVKDAFCDDTNKCKCKKGLVGDGYIKCGK...   |
| 324-357   | PCDGKCKKFASCGADNVHCNPGYVGDOPYKGCSDV...  |
| 358-390   | PCCKGCKENARCENEECVCLQGFVGDOPYKGCSDK...  |
| 504-537   | PCGGSKANEHCDMHSQECVNTGYKLYKKACVL...     |
| 538-571   | PCGGPCQYERCEDEGSNKVCMTGYSLFKGSCVV...    |
| 572-605   | PCGGPCGNAYCDKNKNQCNCNKGYFTYHGVICAL...   |
| 606-639   | PCGGPCQANANCDKNSNQVCNKGYKEIGGVCAV...    |
| 640-673   | PCGGKCPQNSRCDEVINECVCLKGYVFFSGSCKV...   |
| 674-707   | PCGGPCGKNAYCDRISNKVCNTGYISYKGSICAL...   |
| 708-741   | PCGGPCKSNEYCNRNANKCECNQGFYVFKGSCVL...   |
| 742-775   | PCGGPCGLFASCDKSKNQCVCDSGYFLYHGACTL...   |
| 776-809   | PCGGRCCKPNSYCDKSSNQVCNKGYVNYHDSCVI...   |
| 810-843   | PCGGPCKSNSYCDQTMNQVCNKGYIQYHGSCTL...    |
| 844-877   | PCGGPCEKFAYCDRISNQVCNQGYKLFKGSCVV...    |
| 878-911   | PCGGPCQNSQCFVTNKVCYPGYESYKGSII...       |
| 912-945   | PCGGPCGSYATCNKVINKCECIKGYKLYHGQCLI...   |
| 946-979   | PCGGPCGAFATCDEGSNKVCNKGYFLYNGACSL...    |
| 980-1015  | PCGGKCPDNAYCNDIANRCQCKQGFVGDAYQGGCHR.   |
| 1131-1165 | PCGGQCGVHAHCDMLTQECVCDAGYFSFNRGPCAL..   |
| 1166-1199 | PCGGKCGANAYCDRQANRCVCNTGYRLYQGSICAL..   |
| 1200-1233 | PCGGECGPNSRCDYLSNKVCVFPGYFLFKGACAL...   |
| 1234-1267 | PCGGQCAPNSRCDRLTNEVCVNTGYFSFHGSCVL...   |
| 1268-1301 | PCGGHCGPYSYCDKTRNQVCVNTGYFLYHGSCCTL...  |
| 1302-1335 | PCGGKCGPNSRCDRTTNQVCVNTGYFLFQGS CVV...  |
| 1336-1369 | PCGGRCGNNAFCDKSRNQVCVNTGYFLFQGS CVV...  |
| 1370-1403 | PCGGRCGPNSVCDKTRNQVCVNTGYFLYHGSCCTL...  |
| 1404-1437 | PCGGQCAPNSRCDRTTNQVCVNTGYYSFHGSCVV...   |
| 1438-1471 | PCGGRCGPNSVCDKTRNQVCVNTGYFLYHGSCCTL...  |
| 1472-1505 | PCGGKCGPNSRCDRTTNQVCVNTGYFSFQGS CVV...  |
| 1506-1539 | PCGGRCGNNAFCDKSRNQVCVNTGYFLYHGSCCTL...  |
| 1540-1573 | PCGGNCRPNSRCDRTTNQVCVNTGYFSFQGS CVL...  |
| 1574-1607 | PCGGHCGPNSCEDKTRNQCVCKSGYLLFSGSCVV...   |
| 1608-1641 | PCGGHCGPNSQCDKTRNQVCVNTGYFLYHGACAL...   |
| 1642-1675 | PCGGKCAPNSHCDRTSNQVCVNTGYYSFHGSCVV...   |
| 1676-1709 | PCGGRCGPNSCEDKTRNQVCVNTGYFLYHGSCCTL...  |
| 1710-1743 | PCGGKCGPNSRCDRTTNQVCVNTGYFLFQGS CVV...  |
| 1744-1777 | PCGGRCGNNAFCDKSRNQVCVNTGYFLYHGSCCTL...  |
| 1778-1811 | PCGGPCRPNSRCDRTTNQVCVNTGYFSFHGSCVV...   |
| 1812-1845 | PCGGRCGNNAFCDKSRNQVCVNTGYFLFQGS CTL...  |
| 1846-1879 | PCGGNCGYNAYCDKVRNQVCNSGYVLFVFRGSCCTL... |
| 1880-1914 | PCGGRCQNEQCDLSNQCVCKTGFIKFHGGPCQL..     |
| 1915-1949 | PCGGPCGAHSYCNQGTNQCTCDVGYFKFQGGACAL..   |
| 1950-1984 | PCGGKCVYNAFCDKGTNTCKCNPLVGDGSKKCGI..    |

**Figure S3. Sequence alignments of EGFLs in Sbp9**

The PCGGPC motif at the first two Cys residues, which is unique among other EGFLs (highlighted by the blue in 2D), is highlighted by the blue.

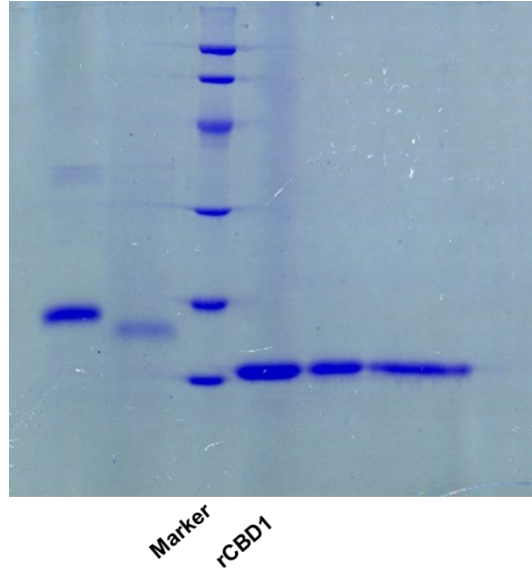

**Figure S4. SDS-PAGE of purified rCBD1**

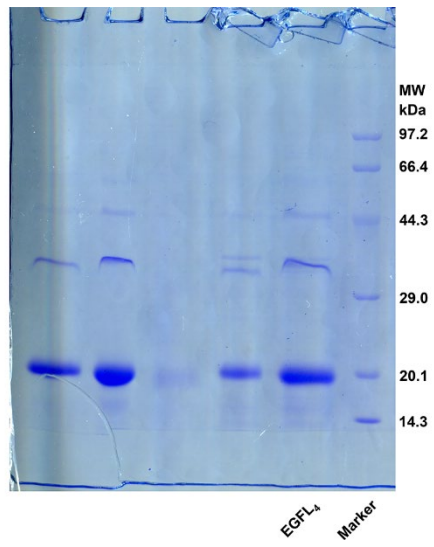

**Figure S5. Analyses of recombinant EGFL<sub>4</sub> by SDS-PAGE.**

**Supplementary Tables:**

**Table S1 Annotation of the proteins identified by MS analysis of band 1 extraction  
from the byssus root**

| <b>Gene ID</b> | <b>Unique Peptides</b> | <b>Score</b> | <b>E value</b> | <b>Annotation</b>                      | <b>Foot specific/<br/>over</b> | <b>Relative intensity (%)</b> |
|----------------|------------------------|--------------|----------------|----------------------------------------|--------------------------------|-------------------------------|
| 52787.5        | 38                     | 94           | 1.00E-17       | Tenascin-X                             | specific                       | 77.3                          |
| 47691.8        | 54                     | 93.6         | 2.00E-18       | Matrilin-3                             | specific                       | 12.7                          |
| 51689.11       | 17                     | 582          | 0              | CD109 antigen                          | Specific                       | 5.2                           |
| 51689.10       | 5                      | 592          | 0              | CD109 antigen                          | specific                       |                               |
| 61191.54       | 13                     | 756          | 0              | SCO-spondin                            |                                |                               |
| 341.8          | 19                     | 3685         | 0              | Myosin heavy chain,<br>striated muscle |                                |                               |
| 47691.7        | 4                      | #N/A         | #N/A           | #N/A                                   |                                |                               |
| 13991.1        | 2                      | 705          | 0              | SCO-spondin                            | specific                       |                               |
| 54635.5        | 2                      | #N/A         | #N/A           | #N/A                                   |                                |                               |
| 59679.8        | 6                      | 1067         | 0              | Paramyosin                             |                                |                               |
| 48907.12       | 2                      | #N/A         | #N/A           | #N/A                                   | specific                       |                               |
| 64771.1.1      | 2                      | #N/A         | #N/A           | #N/A                                   | over                           |                               |

**Table S2 Annotation of the proteins identified by MS analysis of band 2 extraction  
from the byssus root**

| <b>Gene ID</b> | <b>Unique Peptides</b> | <b>Score</b> | <b>E value</b> | <b>Annotation</b>                    | <b>Foot specific/over</b> | <b>Relative intensity (%)</b> |
|----------------|------------------------|--------------|----------------|--------------------------------------|---------------------------|-------------------------------|
| 47691.7        | 11                     | #N/A         | #N/A           | #N/A                                 |                           | 52.9                          |
| 48907.12       | 15                     | #N/A         | #N/A           | #N/A                                 | specific                  | 33.7                          |
| 52787.5        | 14                     | 94           | 1.00E-17       | Tenascin-X                           | specific                  | 9.7                           |
| 47691.8        | 6                      | 93.6         | 2.00E-18       | Matrilin-3                           | specific                  |                               |
| 55319.24       | 2                      | 167          | 1.00E-47       | Calponin-3                           |                           |                               |
| 30077.9        | 3                      | #N/A         | #N/A           | #N/A                                 | specific                  |                               |
| 61295.39       | 3                      | 164          | 8.00E-41       | Collagen alpha-1 (XII) chain         | over                      |                               |
| 61191.54       | 4                      | 756          | 0              | SCO-spondin                          |                           |                               |
| 24253.2        | 2                      | 409          | 10.00E-130     | Beta-hexosaminidase subunit beta     |                           |                               |
| 53111.39.1     | 2                      | 512          | 1.00E-168      | 60 kDa neurofilament protein         |                           |                               |
| 54475.1        | 2                      | 348          | 1.00E-107      | Peroxidase-like protein              | over                      |                               |
| 59679.8        | 2                      | 1067         | 0              | Paramyosin                           |                           |                               |
| 64139.6        | 2                      | 894          | 0              | Tubulin alpha chain, testis-specific |                           |                               |
| 42195.8        | 3                      | 924          | 0              | Tubulin beta-4B chain                |                           |                               |
| 14907.6        | 6                      | 779          | 0              | Actin-2                              |                           |                               |

**Table S3 Summary of EGF/CBD domain comparison between Sbp9 and other related proteins (TNL/NCX1).**

| Query       | Subject        | Score             | Expect   | Identities  | Positives   | Gaps      |
|-------------|----------------|-------------------|----------|-------------|-------------|-----------|
| Sbp9(EGFL5) | TNL<br>(EGFL3) | 48.9<br>bits(115) | 5.00E-16 | 22/33(67%)  | 24/33(72%)  | 0/33(0%)  |
| Sbp9(CBD)   | NCX1<br>(CBD2) | 86.7<br>bits(213) | 2.00E-28 | 43/114(38%) | 70/114(61%) | 2/114(1%) |

**Table S4 Number of free thiol of EGFL<sub>4</sub>**

| Name              | Number of free thiol |
|-------------------|----------------------|
| EGFL <sub>4</sub> | 1.71                 |
| Lysozyme          | 0                    |

**Table S5 Conformational change of byssal proteins**

| Gpoup                                                                      | Secondary structrue |       |                 |               |
|----------------------------------------------------------------------------|---------------------|-------|-----------------|---------------|
|                                                                            | $\beta$ -sheet      | Coil  | $\alpha$ -helix | $\beta$ -turn |
| Control                                                                    | 32.31               | 36.58 | 21.67           | 9.44          |
| DTT/EDTA                                                                   | 51.00               | 26.56 | 13.80           | 8.64          |
| DTT/EDTA treated and then<br>EGFL <sub>4</sub> added                       | 26.47               | 39.16 | 24.23           | 10.14         |
| DTT/EDTA treated and then<br>BSA added                                     | 45.17               | 26.90 | 18.27           | 9.66          |
| DTT/EDTA treated and then<br>Ca <sup>2+</sup> added                        | 48.35               | 29.30 | 15.50           | 6.85          |
| DTT/EDTA treated then<br>EGFL <sub>4</sub> and then Ca <sup>2+</sup> added | 36.81               | 34.79 | 19.50           | 8.90          |

**Table S6 The primers used in this study.**

| <b>Name</b>           | <b>Forward primer (5'-3')</b>                           | <b>Reverse primer (5'-3')</b>                                |
|-----------------------|---------------------------------------------------------|--------------------------------------------------------------|
| CBD1 <sup>Sbp-9</sup> | <b>CGGGATCC</b> AGCAAACCGAG<br>TACCTTTAGCC <sup>a</sup> | <b>CCGCTCGAG</b> TTAGTCGTCAT<br>TTGCAATGTTAATGG <sup>a</sup> |
| EGFL <sub>4</sub>     | <b>CGGGATCC</b> GCACCGTGCGG<br>CGGTAGTTG <sup>a</sup>   | <b>CCGCTCGAG</b> TAAACAACGC<br>AAGAGCCTTTAAAC <sup>a</sup>   |

*a.* **Bold red** are restriction enzyme sites and the words shown **bold** are bases flanking the recognition sequences.

- 1 Li, Y. *et al.* Scallop genome reveals molecular adaptations to semi-sessile life and neurotoxins. *Nat Commun* **8**, 1721, doi:10.1038/s41467-017-01927-0 (2017).
- 2 Robinson, M. D., McCarthy, D. J. & Smyth, G. K. edgeR: a Bioconductor package for differential expression analysis of digital gene expression data. *Bioinformatics* **26**, 139-140, doi:10.1093/bioinformatics/btp616 (2010).
- 3 Ellman, G. L. Tissue sulfhydryl groups. *Arch Biochem Biophys* **82**, 70-77 (1959).
- 4 Bradford, M. M. A rapid and sensitive method for the quantitation of microgram quantities of protein utilizing the principle of protein-dye binding. *Anal Biochem* **72**, 248-254 (1976).

## Supplementary Data 1

### Full length for Sbp9

MAFPKQSKGLSLWICTLTLVASSLADHYASVPYQGGGVIGGGSSGGSKTWCCENANLINGRC  
VCKENYKGD SKHPCDQPCYDRCPNSECDVETFCSCCKNMVGNPYSREGCDVPCGGKCIA  
NAFCNEVTNQCECKAGYKGSATTKCYIPCDNKCKENAFCLESENKCQCNPYQGNPLKGCE  
LPCGGSCPINSYCKDNKVCNEGFVGNPYKDGCDVPCGGKCVFNAYCNSKDNKCYCKEGLV  
GNPYTRCAKPCNDECRQAYCNKKDNKCYCNKGFQGDPRVGCRCPCDDRCVKDAFCDDTN  
KCKCKKGLVGDGYIKCGKPCDGKCKKFASCGADNVCHCNPYVGDYKGC DVPCGGKCKE  
NARCENEVCVCLQGFVGDYKGC SKPSTFSLVQRIYVKNVGVQVQIEVVRSEGSAGSYVVS  
WQTS DGS AVQKQDYVGT KGSVNFKSEAKSQKFNIKIVNDKEYEPDESFTVSLVSVSAGGSLG  
AITLATINIANDDAPCGGSKANEHCDMHSQECVCNTGYKLYKKA CVLPCGGPCKQYERCDE  
GSNKVCVMTGYSLFKGSCV VPCGGPCGNAYCDKNKNQCNCNKGYFTYHGVCALPCGGPC  
KQANANDKNSNQVCNKGYKEIGGVCAVPCGGKCPQNSRCDEVINECVCLKGYVFFSGSCK  
VPCGGPCGKNAYCDRISNKVCNTGYISYKGSALPCGGPCKSNEYCNRNANKCECNQGFY  
VFKGSCVLPCCGPGCLFASCDKSKNQVCDSGYFLYHGACTLPCGGRCCKPNSYCDKSSNQCV  
CNKGYVNYHDSVIPCGGPCKSNSYCDQTMNQVCNKGYIQYHGSCTLPCGGPCEKFAYCD  
RISNQVCVNTGYKLFKGS CVVPCGGPCGQNSQCDFVTNKVCYPGYESYKGSII PCGGPCG  
SYATCNKVINKCECIKGYKLYHGQCLIPCGGPCAFATCDEGSNKVCNKGYFLYNGACSLPC  
GGKCPDNAYCNDIANRCQCKQGGFFDAYQGGCHRPTVIQFVRITYE EKESVGVQVKIDLERTG  
GLYGSVSVTWSTRDISASYGSDFSNDPGLVSFANGVSSASLIINIINDEEYEQTETFSVSLD TVS  
VAVGASIGSKNHVTVTIVDDD KPCGGQCGVHAHCDMLTQECVCDAGYFSFNRGPCALPCGG  
KCGANAYCDRQANRCVCNTGYRLYQGS CAIPCGGECGPNRCDYLSNKVCVFPGYFLFKGA  
CALPCGGQCAPNSRCDRLTNECVNTGYFSFHGSCVLPCCGHCGPYSYCDKTRNQVCNTG  
YFLYHG SCTLPCGGKCGPNRCDRTTNQVCNTGYFLFQGS CVVPCGGRCGNNAFCDKSRN  
QCVCNTGYFLFQGS CVVPCGGRCGPNVCDKTRNQVCNTGYFLYHG SCTLPCGGQCAPNS  
RCDRTTNQVCNTGYYSFHGSCV VPCGGRCGPNVCDKTRNQVCNTGYFLYHG SCTLPCG  
GKCGPNRCDRTTNQVCNTGYFSFQGS CVVPCGGRCGNNAYCDKSRNQVCNTGYFLYHG  
SCTLPCGGNCRPNRCDRTTNQVCNTGYFSFQGS CVLPCCGHCGPNSECDKTRNQVCCKSG  
YYLFSGSCV VPCGGHCGPN SQCDKTRNQVCNTGYFLYHGACALPCGGKCAPNSHCDRTSN  
QCVCNTGYYSFHGSCV VPCGGRCGPNSECDKTRNQVCNTGYFLYHG SCTLPCGGKCGPN  
RCDRTTNQVCNTGYFLFQGS CVVPCGGRCGNNAYCDKSRNQVCNTGYFLYHG SCTLPCG  
GPCRPNRCDRTTNQVCNTGYFSFHGSCV VPCGGRCGNNAYCDKSRNQVCNTGYFLFQGS  
SCTLPCGGNCGYNAYCDKVRNQVCNSGYVLF RGSCTLPCGGRCGQNEQCDSLSNQCVCKT  
GFIKFHGGPCQLPCGGPCGAHSYCNQGTNQCCTCDVGYFKFQGGACALPCGGKCVYNAFCDK  
GTNTCKCNPGLVGDGSKKCGIPCDGRCGSFKHAHCDHTSNRCVCDVGVKGNPYGSLGCV  
DHSGGGNGHY

## Supplementary Data 2

### Related protein sequences

>Cf\_EC1

MAFPKQSKGLSLWICTLTLVASSLADHYASVPYQGGVIGGGSSGGTKTWCCENANLINGRC  
VCKENYKGD SKHP CDQPCYDR CGPNSECDVETFIC SCKKNMVGNPYSREGCDVPCGGK CIA  
NAFCNEVTNQCECKAGYKGSATTCKYIPCDNKCKENAFCLESENKCQCNP GYQGNPLKGCE  
LPCGGSCPINSYCKDNKVCNEGFVGNPYKD GCDVPCGGKCVFNAYCNSKDNKCYCKEGLV  
GNPYTRCAKPCNDECRQNA YCNKKDNKCYCNKGFQGDPRV GCRKPCDDRCVKDAFC DTDN  
KCKCKKGLVGDGYIKCGKPCDGKCKKFASCGADNVCHCNPGYVGD PYKGC DVPCGKCKE  
NARCENE EC VCLQGFVGD PYKGC SKPSTFSLVQRIYNVKEN V GQVQIEVVRSEGSAGSYVVS  
WQTS DGSAVQKQDYVGT KGSVNFKSEAKS QKFNIKIVNDKEYEPDESFTVSLVSVSAGGSLG  
AITLATINIANDDAPCGG SCKANEHCDMHSQECVCNTGYKLYKKACVLPCGGPCKQ NANC D  
KNSNQVCNKG YKEIGGVCAVPCGGKCPQNSRCDEVINECVCLKGYVFFSGSCKVPCGGPCG  
KNAYCDRISNKCVCNTGYISYKGSALPCGGPCKSNEYCNRNANKCECNQGFYVFKGSCVLP  
CGGPCGLFASCDKSKNQVCDSGYFLYHGACTLPCGGPCEKFAYCDRISNQCVCNQYKLFK  
GSCVVP CGGPCGQNSQCDFVINKVCYPGYESYKGS CIIPCGGPCGAFATCDEGSNKCVCNK  
GYFLYNGACSLPCGGKCPDNAYCNDIANRCQCKQGF FDAYQGGCHRPTVVQFVRITYEVK  
ESVGQVKIDLERTGGLYGSVSVTWSTRDISASYGSD FSDNQGLVSFANGESSASLIINIINDEEY  
EQTETFSVSLD TVSVAVGASIGSKNHVTVTIVDDD KPCGGQCGVHAHCDMLTQECVCDTGYF  
SFNRGPCALPCGGKCGANAYCDRQANRCVCNTGYRLYQGSCAIPCGGECGPNSRCDYLSNK  
CVCFPGYFLFKGACALPCGGQCGPYAYCDKTRNQVCNTGYFLYHG SCTLPCGGKCGPNSRC  
DRTTNQCVCNTGYFLFQGS CVVPCGGQCAPNSHCDRTTNQCVCNTGYYSFHGSCVVPCGGR  
CGPNSECDKTRNQVCNTGYFLYHG SCTLPCGGRCGNNA YCDKSRNQVCNTGYFLYHGSC  
TLPCGGHCGPNSECDKTRNQVCCKSGY YLFSGSCVVPCGGHCGPNSQC DKTRNQVCNTGY  
FLYHGACALPCGGKCAPNSHCDRTSNQCVCNTGYYSFHGSCVVPCGGRCGNNAFC DKTRNQ  
CVCNTGYFLYHGSCALPCGGQCAPNSRCDRTTNQCVCNTGYYSFHGSCVVPCGGRCGPNSE  
CDKSRNQVCNTGYFLYHGSCALPCGGKCAPNSRCDRTTNQCVCNTGYYSFHGSCVVPCGG  
RCGPNSQC DKSRNQVCNTGYFLYHGSCALPCGGPCRPN SRCDRTSNQCVCNTGYFSFHGSC  
VVPCGGRCGNNA YCDKSRNQVCNSGYFLFKGSCTLPCGGQCRPN SRCDRTTNQCVCNTGY  
FSFHGSCVVPCGGRCGNNA YCDKSRNQVCNSGYFLFKGSCTLPCGGNCGYNAYCDKVRNQ  
CVCNSGYVLFHG SCTLPCGGRCGQNEQCDSL SNQCVCCKTGFIKFHGGPCQLPCGGPCGAHSY  
CNQGTNQCTCDVGYFQFQGGACALPCGGKCVYNAFC DKGTNTCKCNPGLVGDGSKKCGIPC  
DGRCGSFKHAHCDHTSNRCVCDVGVKGNPYGSLGCVCDHSGGGNGHY

>Cf\_EC2

MAVSSPMHHFFMICLLVIVSSVSSATYRYETVQE KAPSPYKDDSGPSPYKDDL GSSPYIDDSG  
PSPYKVDSGSPYKVDSGSPYKDDSGPSPYKDDSA AKTKCCDNAILINGRCVCKQNYK GND  
KHKCIQPCDGKCMNNSYCSEADNKCYCYDGYVGNAYLEGCDVPCGGKCAINAYCRPKDNK  
CCCKDGYEGNPYFKCSKPCDDACQNN SYCSKRDNKCYCNNGYIGDPTTGCSLPCDKKCKD  
SYCDEV TNKCVCKKGLIGDPYVSCKQPCDG SCKKNAYCRESDNKVCNDGYIGDGYQGC DV

PCGGKCKDNTYCNPDSNTCQCDPGFIGDPYVQCYEPCGVQFVQSNYTVDESIKRLSIQVSRK  
GGSYGAVTVKWETKDLTATFGNDFSNNNGKITFIKGETIQTFTITIVNNKIHEPTETFSVRLTAIS  
AGGFIGFLKVTITIIDDEACGGPCGSNAYCDQTSQKVCVNVGYNLYKGSCTVPCGGPCELN  
GYCDRSLNTCVCKHGYQIFNGACQLPCGGSCGDYAYCDKDTNQCICNNGYVSYQQACVLPC  
WGSCGDNQYCDTDSNECVCKRYITYHGSCVSPCDGRCVENAYCDQKINKCVCKKGYVLH  
YGKICIGPCDNACKENAYCNHENVCKCHSGFYGNPLKGCTLPCGRKCKAHAHCDLEPKQQCN  
CDDNYIGNPYVGVCKLPCDGGSCGKNAYCEDDTNKCVCNKGYFIYGGSCALPCGGPCKKYAHC  
DRDSNECVCDKGYTVYDNSCVIPCGGSCGPYAQCESHYTNRCICDYGYVLFQGGSCVRPCNNA  
CKENAYCSHDNVCKCHAGYYGNPLRGCTLPCDGRCKDYSHCVLKPKPRCVCNDNYIGDPYS  
GCTLPSDVGFLRARYSVLESDEEVVLQLTRTGGITESVTVRWLAKSMTATYRKDFDRNKGQV  
TFPKGQTMVEFIIGIINDQVYEHPEQFSVSLTTISKGGILGQINTAIVTIRNDDKPCDGGCINAV  
CEMSSQKCKHGYFLSQGSCILPCGGQCKSNAYCDHGTNRCVCNNGYEMYDGSACVPCGG  
KCGPNSYCNKLSNQCVCFTGYDTYNGTCSLPCDGGSCVYNAYCDRDSNTCKCNKGLVGDATK  
SCGLPCDGRCRYFPHSHCDDNTNMCACDKEWHGDPYGKEGCICKGENHYGRVPKYSQDQTQ  
PSYFRNG

>Cf\_EC3

MAHLLRTIGLLFIICAVILVAPSCAKRNRKRKNKAVYSPPKVVTPPPCKTTTPPKKTTLPKKIT  
VPPKKVPVPPKGNDYAQTGGNYPPSTGGDYAPSNGGNYPASTGGDYAPSTGGDYPPSTGGD  
YAKGGNYVPAKKCCDNAV LKNGRCVCKPHYGTSTHPCVRPCWDKCGPNTRCDEETFKIC  
KDFVGDYKYGCHLPCHGKCVENASCNEETDKCECDEGLVGDGAIECFEPSTVVFADKSYEV  
SESQSTLKVEVLRQGGINSIVTVKFQATDGTAVHGSYDFNNHGVITFQRTVTSQYITIIHNDLV  
FEQSETFKLTLSVIRGEIGEPSTTTITITDDDDPCGGKCGPHSHCDEATQQCVCDEGFVEDSYH  
GGCTLPCGGGCCANAYCNPKDNRCYCNEGYYGIPTLNCYLPCGACKANAICGKNNQCYCK  
TGFYGNPYEGCYPPCHGKCGTNARCDISTHTCVCNDGFFGDPYDHCDKAAVIGIEPTYSVNE  
NAGFVEITVIRTGSTFGTIFAIWKTSDITATSGEDYGGGIGIISFADGQDSTTISIFIANDKIFEGAE  
TFSVSLTFVSAGGVLGVHIQTIVTIVDNDPECGGACPPNKHCKDEKTQKVCNKGYYPDHYGG  
CQLPCGGGCCANAFCDYKSNCTCKCNTGYIGIPTVACFKPCKGGCGANAYCVNNKCVCKPGY  
WGNPYSGCYLPCHNLCKENAECDLTHTCRCLPGFVGDPLKGCTKPGTFIFTQTTYTVQENV  
GIVITVSRVSSFGAVKVSWSKDGTAIQGRDYKHAQGVWFASGEVSRTISIVIINDNVYEKD  
ETFTVSLTISISIGILTSSVATITIKDDDPSCGGPCPPNSHCDEVSQKVCNHYHFDANYGGCIL  
PCGGRCCLNAYCDVKYNQCKCNAGFIGITVGCYKPKGLCKVNAYCGKDNTCCCKPGFFG  
DPYVGCTEACNGRCKENARCDIPTQTCQCLPGFFGDPEVCGKPGNFEFERSSYEVSSESAGSL  
TVTIVRRVGSSSGSVAVTWATDTSATSNDYFNTQGVLFANQVITKTITFYINDDSIYEDNESF  
DVTLLSVIPAGGLGSIRVTTVTIKSDDPPCGGPCVNSYCDIPSQKVCNKGHISFKGSCVPCG  
GKCCANAYCSHKTNQCNCNPGYLGNTQKCYPCNACKGNSYCGKDNKCHCKTGYYGNA  
YTECHLPCHGLCKKYSKCNLVTQQCVCLPGYFGDPKVGCHGMFVFLVQSTYFVSESVTSVE  
IQVKRTGSVSGSVQVTWTATDLTAIHGEDYANSGGTLTFNDGDVFKTIIVLIRQDEKFEADEQF  
VVTLTSTTGGVLGLLRKATVTIENDDKPCGGKCVFNAHCDEATDTCICNKGVLVGDGTVKCD  
YSILYFQIPVADIAQPTHTLVTTRQTNVSVTTNTEGIPITEDVYALLEDIPEDMEVILVVVMELP  
AEVIVAVMEVPAEVIPVAVTVEDIPAAMVMEIPAEVIVAVIVEVIVAVMEILVAVIVEDIPVAVTD

PPAEVIPVAVINVPALVSAYAIPVTMVEVIANQALNKIFEINTVCRMITASETSIEPVLVTSGTGSG  
NRMERGFE

>Cf\_EC4

MAHLLRAVGFFVINAAILFAPSSGSDYAPVSKQGYVPTHDAHLPPPAGDYAPPKGGDYPAQKC  
CENAKLINGRCVCKPDYYGPSTHPCVQPCWDKCGPNTRCDVNSFKCYCKDGFIDPYKGCH  
VPCYGKCVENASCNLDTDECECNDGLVGDGTVKCFEPSTFVFEKETDTVSESQSTLKIGVLRQ  
GGTDGVVAVVFKTTDGTAIHGSDYFNHSHGVIIIFHDQVAIQYITIYINNDLVFELSETFTVTLVSV  
SIGNIGEPSTTTITITDTPCGGKCGPHSYCDEEAKQCRCDKGYVEDSYHGGCKLPCGGGCC  
ANAYCNPKNRCYCNEGYHGIPTLNCYQPCGACKANAICGKNNICVCKPGFFGNPYEGCYP  
PCHGKCGTNARCDIPTHTCVCNDGFFGDPYDHCDKAAVIGIEHPTYSVNNENAGVVEITVIRTG  
STFGTIYAIWKTSDITATSGEDYGGGIGIISFAAGQDSTTISIFIASDKIFEADETFVSLTFVSAGG  
VLGVHIQTIVTIVDDDEPCGGPCPSNKHCDKAQKVCNKGYPDRYGGCQLPCGGGCCAN  
AFCDYKSNCKCNTGYIGIPTVACFKPCKGSCGTNAYCVNKNKCVCKPGYWGNPYSGCYLPC  
HNLCKENAECDLTHTCRCPGYWGDPLVGCTKPGSFIFTQTTYTVQESVGVISITVSRVGSSE  
GAVKVTWSTKDGTAIQGSYKHAQGVWFASGEVSRTISIVIINDNVHEKDEFTVSLTSISIGIL  
TSSTVATITIQDDPSCGGPCPPHSHCDEVSQKCVCDHGYHKDPHYGGCVLPCGGGCCVNAY  
CDVRYNQCKCNAGFIGITVGCYKPKGLCKVNAYCGKDNRCCKPGFFGDPYVGCHEACH  
GRCKANTRCDPHTHTCHCLPGFYGDPLVGCCKPGRFEFERASYETSESSGSLTVTVRRIESSG  
AVAVSWATTDVSAIHDVDYNNQGVLFADGVTIRTITFTIDDDSIYEENEIFRVSLLSVVPAGG  
FGTITTTTIVTIKSDDPACGGPCPLNSYCDIPSQKCKKGGHILFHGSCVIPCGGKCCANAYCSHK  
DNQCHCLSGYIGNPTQKCYIPCNNACKGYSYCGKDNKCHCKTGYYGNAYLECHLPCHGLCK  
KYSKCNLVTQQCVCLPGYFGDPKVGCHGMFTTLVQSSYSVSESVTSVKIQVKRTGSVFGSV  
KVTWTATDLTAIHGQDYANSGGILYFKQGDVFQTTITVLILNDEKFEADEQFVTLTSTVTTGGVL  
GLLRKATVTIENDDKPCGGKCVHNAHCDEASDKCICNKGLVGDGTVKCDCKF

>Cf\_EC5

MVDVEPMLDVISQSIHVFMVMSLVTHMLIVTIFEAEETFVSLTHVSVGGVLGVHIQTIVTIV  
DNDEPCGGACPPNKHCDKKTQKVCNKGYSFDHYGGCQLPCGGGCCANAFCDYKSNICKC  
NTGYIGIPTVACFKPCKGGCGTNAYCVNKNKCVCKPGHWGNPYSGCYLPCHNLCNAECDL  
THTCRCPGYWGDPLEGCTKPGSFIFTQTTYTVQESVGVISITVSRVGSSEFGAVKVTWSTKD  
GTAIHGSDFVHIQGVWFASGEVSRTISVVIINDNVYEKVVETFTVSLTSISIGILTSSSTVATITIKDD  
DPSCGGPCPPHSHCDEVSQKCVCDHGYHKDPHYGGCVLPCGGGCCVNAYCDAHYNQCKCN  
AGFIGITVGCYKPKGLCKVNAYCGKDNRCCKPGFFGDPYFGCHEACHGRCKANTRCDP  
HTHTCHCLPGFYGDPLVGCCKPGRFEFVQSNEYVSESSLVTVTVRRIESSGSAVATWATTDV  
SATHDVDYNTQGVLFANGVITRITFTIEDDSIYEENETFTVSLLSVVPAGGFGTRTTTTVTI  
KSEDPACGGPCPLNSFCDIPSQKCKKGGHIFHGGSCVIPCGGKCCANSYCSHKDNQCHCNSG  
YIGNPTQKCYIPCNNACKGNSYCGKDNKCHCKTGYYGNAYLECHLPCHGLCKKYSKCNLVT  
QQCVCLPGYFGDPKVGCHGPSVFLVQSSYSVSESVTSGEIQVKRTGSVSGSVRVTWTATDLT  
AIHGEDYANSGGTLTFNNGDVFKTIIIRNDE

>Cf\_EC6

MNDVTNPVTSVSVSTDILNSADLVFVIPCGGSCPPNSKCSSSDNRCHCNPGFLGDPYKGGCHR  
RSVVEFAITTYTVSESAGTVSLQLSRSVGLFGSVTVSWSTRDGSARYPGDFSQNSGVATFGNG  
QDSTTFIAIVNDQIYESSSESFTVTLSSVAASSSSVVTIGQRSVATVTITNDDPPCGGPCPNARCD  
LSSQKVCNSGYFRFGSSTCQLPCGGPCRGNERCDEPSDQVCIDRYIKFHGACVLPCGGP  
CRSNERCDIPSDQVCIERVVKFHGACVLPCGGSCPLNSRCSDDNRCHCNPGFLGDPYKGGC  
HRRSVVEFAITTYTVSESAGTVSLQLSRTVGLFGSVTVSWSTRDGSARYPGDFSQNSGVATFG  
NGQSSTTFIAIVNDQVYESSSESFTVTLSSVAASSSSVVTIGQRSVATVTITNDDPPCGGPCPNAR  
RCDLTSQKVCNSGYFRFGGSTCQLISHVDLVLEPFVLMDSFLVEDVVHQIQNVTDKPTN  
VNVLEVTKIHRVDVDCLAEDHVEDLMKDVTPVTVNSVSTDILNSTELVFIIPCGGPCPSN  
SKCNLAVNRCQCVPPYKGDAAHHGGCKLPCGGNCPNSKCNLAVNRCECIPPYKGDAAHHGGC  
KLPCGGPCPKNSQCSSSDNRCHCNHGFEGNPYHGGCHLRSVVEFGQIITYTVSETAGQVSLQLR  
RTGGLSTSVTVSWSTQNGIAGNGGSAVYPDDFQNEGHATFASGQIETTFNIGIVNDQLYEQPE  
AFTVTLVSTQGSNTNIVEIGQRSVATVTIISDDPPCGGKCVFNAYCDKESNTCRCNHGLVGDPT  
KKCGIPCDGRCGSFPHSHCDKITNRCICDTGYTGNPYGSVGCVCAGGHGGGGGGYSGGSSG  
ISYHGGVSGGSYHGGSSGGSYQGGSTGGSYSGGSSGGSYHAGSSGGGGYEPHGSY

>Cf\_EC7

MAIRKLSQGYCLWICVLLAATYADHVSDYGFGGGYSGGNTGGSYGGGNTGGSYGSGNTGG  
YSAGNTGGSYSGSSHVDVGGYDDNSHVSGGGYGGASYGGGGVVVDHSHTGGGYGGSGGD  
KTHCCDNADLINGRCVCKENYKGHSTHPCDKPCYGRGKNAKCNKQTFECYCFEGYIGDPY  
TVCDLPCGGKCGTNAYCDSGSNSCRCKTGFIGDAKTRCSEPSVVSFAQSSYSVRENSGVLKIK  
VIRKGGTFGSFTVQWTVSDGSATSPSDFSTLAPLQFNNGDGVQIISINIRNDEFFEPDESFTITL  
TSVTAEGRIGSPDVTTVTIINDKKCGGKCKANAYCRESDNTEVCNTGYIGDPTKGCKRPCDG  
KCKKNSFCDPQDNRCCKHGMVGNPYKEGCDVPCGGKCVLNAFCRERDNKCYCKEGYIGD  
GTVKCAKPCNDECRHNAYCSKKDNTCYCNKGYIGDPKVGCDLPCGGKCASTAYCDSGSNTC  
KCKKGLVGDPHVRCGKPCDGKCKKNAFCNDNNECQCNPGYVGNPLVGC DRPCGGKCRNTA  
FCDEHSNTCKCNRGYIGDPQRGCYEPSVFQFVQRLYTVSEDDGSVNIEVVRSKGTEGSYTVS  
WEATDGSARFPSDYGNSKGTVVFKPNEKSDKISIKIVNDKVFEPTEFTVTLTAVSANGALGVL  
TVTTVTITNDDPECGGPCGANAHCDSPTRCVCNVGYRLIRGSCALPCGGPCPNACQCNERT  
NKCECITGYSLIQGSCSRKFQFHCVTGLQKSCFSQSKIYHNDKKSSSTIKLRKLKSKKHPNCK  
LLTSTELQDHAEDHADQTSVTLTQTNVSKDTDYSTEVSFHVVEDVVHQIQNVAVQTTDA  
IVIQGLKEIHITEDVNVIRIGFHNDVFKQVS

>Cf\_EC8

MFYQLPTFSLLLAVCVVSIITQTHGGYVAPPVKTCCENAYPSYGRICKNGYHGDSNHPCVPP  
CNGKCGKNTYCDLKWFKCFCKPGFKGDPYEGCCLPCGGDCIANAFCDTSLDKCKCNDTFIG  
DPKVNCFKPSVCHFVRTQYVVSETAGFVRIQVNRINGIYGTVTVRWVTTISATLNADYIGAS  
GSITFLTGEATKFIQIKIVNDNIYERNETFAVVLTSITIGHRIGVPCKTVVTIISEDKPCGGYCKKN  
SHCDIPTQKVCNTGYLWGHGQCELPYGECKYAKCNIQTFKCCCIPGYGDPTKQCAKPG  
IFEIERREYTVKESAIEVLIVVKRTGSFFGNVKTWVAKDITAIHGHDYVNHGGTIFFASGVTSQ

IIKVKILNDVIYEKREQFSVRLVTISSGGRFGAIVVTTVNIMDDDEPCHGHCSKFHAHCNEFTQ  
KCECDIGFIGNPNYECCCKPCDGGKCLYNAKCDKDHNVVCNPPPLVGDGVTKEPPCGGPCPVN  
SHSHCDKKINKCVCDDHYFGDPPFHGGCKCQTDYKG

>Cf\_EC9

MLQLPTVSLFFVASSVLLLIGTSQGTYLPPAKACCDNARLINGRCVCKDNYGdsthKCRQPC  
DGKCDKNEKCDLYTFICSCKPGFVKLPNSDKCVVPCGGDCITHAQCNKNINKCECTKPYIGD  
ASVACYLPSKFQLKRPAYIVSEdVGAVKIQVDRIEGVIGAYDVKWQTNdVSAKLNLDYKFKT  
GTVTFGNLQTTGFISIPiDDTIYEVDEKfELTLVAVTNGGKLGTLIKTVVTIHdNDLPCGGKCK  
RNSYCHIPSQKVCNPKFVLYRGNCEKPCFDRCCLNAYCNEKEFKCYCKEGFYGQPTKRCEK  
PSEYKLRDEEYTVKESSLVVKIVLRTVSTLGPakVTWVATdVSAKHGLDYIGHKGDiyFKDG  
QSSATFTIEIVNDKfYEEKEKFFVTLTTVTAPVPCNGRCVTNARCDPVKKVCVCLPGYIGNAY  
KECHRPCHGECLKNAYCDEEVNHCVCNKGVLGDGVKKCAPPCDDRCKNFKHSCHDYKSNR  
CVCDDTYHGDAYTNSCVCGTQHY

>Cf\_EC10

MTHLLRTIGVFFVYAAIFVAPSEGGKRYRKgKYVPPPKVYVPPPKVYVPPKDDYVPPPNND  
YVPPKkDYVPPPKVYVPPKDDYgPPPKNDYVPFKKVYVPPPKVYVPPKDDYVPPPKNDYV  
PFKKVYVPPPKVYVPPKDDYVPPPKNDYVPFKKVYVPPPKVYVPPKDDYVPPPKNDYVPFKK  
VYVPPPKVYVPPKDDYVPPPKNDYVPFKKVYVPPPKVYVPPKDDYVPPPKNDYVPFKKVYV  
PPPKVYVPPKDDYVPPPKNDYVPFKKVYVPPPKVYVPPKDDYVPPPKNDYVPFKKVYVPPPK  
VYVPPKDDYVPPPKNDYVPFKKVYVPPPKVYVPPKDDYVPPPKNDYVPPKKVYVPPKDNYK  
PPPKDDYVPLKDDYgPPKDDYFpSKGGDYNDGGYgPSSGGGYVPAKKCCENAVLINGRCVC  
KPNYYGSSTHPCVKPCWnkCGDNARCDVKEFKCYCKDGFIGDPEKGCHVPCHGKCVENAS  
CNEETDTCECNEGLIGDGILGCFEPSTVQFGRESYEVSESVRTLKVEVLRQGGIDSVSVVFKA  
TDGTAIHGSDYFNHGTIIFLKGEQTQYITiYIINDSVFEQSETFQLTLVSVIRGEIGVPSTTTITIT  
DNDDACGGKCGSHSDCDEATRQCRCHKGYVEDPYHGGCTLPCGGRCCANAYCNPKDNRCY  
CNEGYYGIPTLNCYKPCKGACKANALCGKNNQCfCKTGfYGDpYVgCDHIQTDDefSFTSLC  
NWEKVDPLLLYDFRCfNYSHGCPFLVHGREVDIADDS

>Cf\_EC11

MAKYSPNQIQHNrLETPMPILVTFcVPCGGECSTTAYCDETTNQCVCNpGLVGNPKRGCARPC  
NDACGENAFcNKDDNKCYCDDGYIGNPTAGCTLPCNGKCVENAFCKREQCFCNKGLIGDPT  
VQCYVPSVVQFVQTSYTVQENIGQLTVEVRRVKGSAGRFTVAYSTNDKSAKSGEDYTAANGV  
LIFNSGVISQSIYIQITDDDEYEPKDETFEVRLSDATGGAKIGELKKAVVTIESKDCTNFEI

>Cf\_EC12

MDCYIFPRGKSyeEDFLIMYQRQEEKIEHENRAYTTMKRTGGKfKENSkkSSTLfkMMHQIPT  
LGLCFTLLCVLSfLGTTKGTYMPVHCCTGSTPYGSRVCNPGVHPDRYHNCIEPCWNRcGAN  
ADCNKYTFKCFCKSGFVGdPEKGCtrPVSTfQfARSSYTVNENAGfAKLQIDRISGVSgrVTL  
SWKSFsISATLNSDYKGASGTITfESNEKWKSIQIPIVNDKLFektETfKvILTSASSGGRLGPRR

LTVV SIRDDDLPAKFQFARSSYVNVENVGSVKLQIDRISGGLNKVTLYWKSTGITATLNSDYK  
GASGSITFGVGEKWKSVIPIVNDQIFENTETFKVTLTSASAGGELGPRRETVVTIKDNDPPSKF  
QFARSSYAVGESAGVVKLQVDRISGGLQKVTLYWKSTGITATLNSDYQGASGSVTFGVGEKW  
KLIQIPIVNDQIFEQIETFKVTLTSASTGGAIGPRSTTVTIKDDDLPCQGKCKYYAYSVCNPKT  
NRCVCKPNYYGDPYHGGCRCGGGGGGY

>Cf\_EC13

MLQLPTVSLFFVASSVLLLIGTSQGTYLPPVKACCDNARLINGRCVCKDNYYGDSTHKCRQPC  
DGKCDKNEKCDLYTFICSCKPGFVKLPNSDKCVVPCGGDCITHAQCNKNSNKCECTKPYIGD  
ASVACYLPSKFKQLKRPAYIVSEVDVGAVKIQVDRIEIGVIGAFDVKWETNDISAKLNLDYKFKTG  
TVTFGNLQTTGFISIPIIDDITIEVDEKFEITLVAVTNGGKLGTLIKTVVTIHDNDLPCGGKCKR  
NSYCHIPSQKVCNPKFVLYRDNCE

>Cf\_EC14

MFQPIPAVGLCVTLCVLSLLETTQGSYPVCKGSKPINNRCVDEGVHPDKYHNCVEPCWKK  
CRANADCNRNTFKCYCKPGFVGNPYVGCLRIAKFQFARSSYVVRENTGIVKLQVDRISGGLH  
RVVVKWAATKITAQPGTDYIGNFGTVTFEKGEKWKFIEIRIVNDQIAEPTEKFKVTLRSASPGG  
AIGRSVTTVTITDSDSIAKFQFARSSYVVRENTGIVKLQVDRISGGLHRVVVKWAATKITAQP  
GTDYIGNFGTVTFEKGEKWKFIEIRIVNDQIAEPTEKFKVTLTSASAAAIGRSVTTYHVEESA  
RDTLTPSVTRTPTNVFVKATTEMRTMEDANVVEGVVISRPNRTMC

>Cf\_EC15

MTHLLRTIGVFFVYAAIFVAPSEGKRNKKAKYVPPRKVYEPKDDYRPPPKNDYVPSKKV  
YVPSNDDYGLKDDYVPSKGGDYNDGGYGPSSGGGYVPAKKCCENAELINGRCVCKPNYY  
GPSTHPCVKPCWDKCGDNARCDVNEFKCYCKDGFVGDYKGCHEPSTVKFARESYEVSESV  
RTLKVEVLRQGGINSVVSVVKATDGTAIHGSDYFNNHGTIVFLKGEQTQYITIIINDSVSYFR  
FRMTMLVWHL

>Cf\_TNL

MSSSVLFAVSLFLGAPKTLAWEGCIGQCPEHSWCDVTDNRWKCSPGYTGDYPCSTGCVQNP  
ILPQCCENAFRNGSNCVCKSGYVGDGFYSCKPVPCFGRCECTNAYCKIVDDKCYCKPGFVGDY  
YKGTVPDCKCTNAFCKDSENKCYCKPGFVGDYEGCKEPCDGKCLTNAYCKASDNKC  
YCKPGFTGNPYEGCIGTYFVSVPCGGKCKANSYCRSDNKCICKSGFTGNPYSGCIVPCWGK  
CKANSYCRSDNKCICKSGFTGNPYSGCIVPCWGKCKANSYCRSDNKCICKSGFTGNPYSGC  
IVPCWGKCKANSYCRSDNKCICKSGFTGNPYSGCIVPCWGKCKANSYCRSDNKCICKSG  
FTGNPYSGCIVPCWGKCKANSYCRSDNKCICKSGFTGNPYSGCIVPCWGKCKANSYCR  
TSDDKCVCKSGFTGNPYVGCIRIVPCWGKCRAYSICRTSDNKCICKPGYTGNPYVGC  
CGGKCRANSYCRSDNKCICKRPGYTGNPYVGCRTVPCGGRCRANSFCRTSDNRCCCRAGYS  
GNPYVGCRTVTVPCGGRCRANSFCRTSDNRCCCRAGYRGNPYVGCRTVTVKQQLPERIV  
NVSACYSDPNAIRANCSSTEMIAVDKVNAGAKLITSCMSAASIVNLTPDCCERDKDNDCYT  
PFVNQANLTYTYHEQCIGQETCGPIPVQWMRIPDCKNSAQYRNYTGYLDIYHYCIKNTSV

GVLPDVSLSGNSALYLQGGQYPAYMPQRSVNCVLEVIGGCGVSIQAIHISFDENGGVCQQ  
NIMISDLNRTENITCDNNNNYNITKMYSTASNYVTLNISSQRGNAQFWIGFIPNSGGTMDLSC  
PAVPRSMGTPCAVTDKPSSETTTDDTTDASTDANTYDSTETSSGSTSIIIAVVVSVILLIIFIVVL  
LLRWKYRKQKEAKVVPEKDDNVSHNGDTSNHAIDVFRSIPFETSTAPWATAVVGSRGNSLPP  
IKSQTNDVPEQDGHKKKKKKKKRKKMKNNDDDEGQILAFEDVGESNE

>Cf\_NCX1

MSCDLSDYKCADKGLILPLTSEYTWISIGFRAFVYIVGLLYCFMGVSIADIFMQAIETITRSARI  
KMPDPSNETGYTEVEVKTWNGTVANLTLMALGSSAPEILLSIIEIVGNGFQSGPLGPSTIVGSA  
AFNLMCITGVCIIIPDGIVRRIKNIKVFAVTSIFSIFAYIWLAILMVTTPDFVDLWEAIITLLFP  
MVLLAYIADKDYCGKKPIDDESKLLEIDEENLLNGDRADKHVIVEILRRLKREKEATPEDMAR  
LTAHLMEQNQSHGRGWYRINAIRNLSGGTKLTTMTDKTNEQMGSTASFTSMSEGGKKAII  
EFAAPSTAVFEKDGHARITVMRHGNLKNRVLYRVETIDGTAVEGEDYTAFKDTLVFEPNETVK  
HIDIQIIDDNIWEPDEVFFGRITLDSEKQNAVVGRRAITQIVILNDDDPGVLEFEHPSFLFKESVG  
TALVPVNRDGDADGKVTVTWTKDMTAIHGRDYENTEGTLTFDHGERTKFIEIQINDDKEFEK  
DENFEINLLDTTGGAKIGKLRVVTIVNDDFSGLVSRITSLTNANLDSLRLQKQTWGQQFV  
EAMNVNGGDLTATTFDYVMHFLTFGWKLIFALVPPATIWWGGWFCFVVSAMIGLLTAFIGDL  
ASIFGCLIGLDDSVVAITFVALGTSLPDLFASRTAALNEKYADTAIGNVTGSNAVNVFLGLGLP  
WTMAAVYWSARGTTFEVPAGALGFSVVVFTLCSLLTISFLLRRNLNLFSAELGGSKVSKIL  
SGLFCIIVVVYVLLASLNAYEHIPGF

>Py\_ecZ

MAHLLRTIGLLFVIYAVILVAPSCAKRNRKGRKSKEGYVPPKKVPVPPTVVHVPPKEVPVPPKK  
VPVPPTVVYVPPKEVPVPPKVYVPPKEVPVPPKEVYVPPKGGDYAPSTGGDYAPPAGDDYA  
PPKGGDYVPAKKCCENAVLTNGRCVCKPNYYGSSTHPCVQPCWDKCGINTRCDVNTFKCYC  
KDFIGDPSKGCCHVPCGKCVENASCNPDTDKCECNEGLVGDGTVRCFEPKIVFAKETYTV  
SESVSTLTVEVLRQGGTIGVVAVTFKATDGTAIHGADFFNSHGTIVFGEGVSTQYITIYIVDDSIY  
EQSETCDLTLVSVSVGGEGEIPSTTTITITDNDACGGKCGPHSHCDVPIQQCHCDKGYVEDPY  
HGGCTLPCGGRCCTNAYCNTKDNRCYCNEGYYGTPVNCYQPCGACKANAICGKDNKCY  
CKTGIFYGNPYEGCYPPCRGLCGTNARCDISTQTCVNGGFFGNPLEHCDKAAVIGIAQATYSV  
NENAGFVVITVTRTGSTFGTIFASWKTSDITATHGNDYGGGEGVIRFVDGEESTTIRIFIVNDKI  
YETDETFVSLTHVSVGGVGLGHIQTVVTIVDDDEPCGGPCPPNTHCDEKTQTCVCKGYISD  
HYGGCQLPCGGRCCTNAHCDYHDNTCKCNTGYIGIPTVACNLPCKGACKANAYCASNRVC  
KTGYGPNPYEGCYLPCRNLCGNAVCDLSTHTCRCIQGYWGDPLKGCTKPGSFVFAQTYYT  
VQENVGIVSITVNRVGSFSAVKVTWATKDGSAVHGNDVNTAGAIWFASGEVSRITISIFIISDN  
IFEKEESFTVSLTISIGTLTTSTVATIIIKDDDPSCGGPCPAHSHCDVVSQKCVCDHGYPHDANY  
GGCILPCGGRCANAYCAHYNQCKCNTGFIGTIGICYKPKGACKLNAYCGKDNRCCKP  
GFYGDYDYGCTEACKGLCKENTRCDIPTQTCQCLPGFYGDPLMGCGKPGQFVFAKSSYSVTE  
GAGSVTVTVNRIGSSSGGVAVTWATDISATSLVDYFNTQGVLFADGVITKTITFTIYADKVYE  
VDEQFQVTLVSVVAGGLSLTITVTIINDAACGGPCPVNSYCDKISQKICNKGYILFHGS  
CVIPCGKCCANAYCSHKDNQCHCNSGYIGTPTQKCYIPCNNACTDYAYCGKDNKCHCKTG

YYGNPYSKCHLPCHDLCKKYSKCDLVTQQCVCLPGYFGNPKEECHGASVFLVQSSYAVSESI  
TQVVIQVKRTGSSSGSVKVTWTATDLTAIHGQDYANSSGILYFNDGDVFKTITIHILNDEKFEA  
DEQFAVTLTHVTAGGVLGVLKATVTIENDDKRCGGKCVFNAHCDEASDKCICNKGLVGDGT  
VKCDRKY

>Py\_ecY

MAHLLRTIGLFFVINAAILVAPSSGDDYAPVNIPGKGIYVPPKDDYVPPKGGDYAPASGGGYVP  
PKGDDYVPATKCCENAVLTNGRCVCKPNYYGSSTHPCVQPCWDKCGINTRCDVNTFKCYCK  
DGFIGDPSKGCCHVPCGKCVENASCNPDTDKCECDEGLVGDGTVRCFEPKVVFAKETYTVS  
ESVSTLTVEVLRQGGTIGIVSVTFKATDGTAIHGSDFFNSHGTIVFGEGVSTQYITIIINDSIYEQ  
SETFELTLVSVSVGGEIGEPSTTTITITDNDACGGKCGPHSHCDGPILLCHCDKGYVKDPYHG  
GCTLPCGGRCCTNAYCNTKDNRCYCNEGYGTPTVNCYQPCKGACKSNAYCGKDNSSCCCK  
PGFYGDYVVGCTEACNGLCKENARCDIPTQTCQCLPGFYGDPLMGCCKPGQFVFAKSSYSVT  
EGSGSVTVTVNRIGSSSGVAVTWATDISATHNIDYFNAQGVLEFFADGVITRITITINADTLY  
EVDERFQVTLVSVVPAGGLGSLTITVTIINDAACGGPCPVNSYCDKLSQKICNKGYILYHG  
SCVIPCGGKCCANSYCSHKDNQCHCNSGYIGNPTQKCYIPCNNACDDYAYCGKDNKCHCKT  
GYYGNPYSKCHLPCNDLCKKYSKCDLVTQQCVCLPGYFGNPKEECHGASVFLVQSSYAVSE  
SVTQVVIQVKRTGSSSGSVKVTWTATDLTAIHGQDYANSSGILYFNDGDVYKTITIHILNDEIFE  
ADEQFVVALTHVTAGGVLGVLKATVTIENDDKRCGGKCVFNAHCDEASNTCICNKGLVGD  
GTVKCDLPCGGHCGVYPHSHCNKYTKNCECDDKYHGDYHGGCICNTGGHTGGSYGSTGG  
SHTGGGYGSTGGHTGGNYGSSSGSYTGGSYGSSSGSHTGGSYGGGNTGGSYGSTGGHTG  
GSYGNTGTGGGYGSTGGSYGGSHTGGSYGNTGGGHSGGHTGGSY

>Py\_ec7

MAIRKLSQGYGLWICVLLAATYADHIQDYGGGGGFVDGGAGGGYGGPSHVVVGGYDDHSH  
GGGGVYDDHSNVGGGGYGDASHGGGGVYDDHSYVGGGGYGGASHGGGGVEFVDHSH  
GGGGYDDHSHGGSGGGKTHCCDNADLINGRCVCKANRYRGHSTHPCDKPCWDKCGTNTY  
CNVQEFKCYCKEYIGDPYNECDLPCGGKCCASNAYCDSVTNTRCNTGLIGDATQKCFSPSVI  
AFAQSSYTVRESVGLKIKVTRQGGTFGSITVGTWTVSGGTATSPSDFTFALGSLQFGNGDSVEF  
ISVKIVNDQAFEPDESFTVTLTSVTSGGTIGSPDVTITITNDDKPCGGKCKANSYCRESDNTC  
VCNTGYIGDPLRGCKRPCDDKCKKNSYCAPHDNRCYCNKGLVGNPYKEGCDVPCGGKCVL  
NSFCRERDNKCYCNEGYVGDGYVRCAPKPCDDACRHNAYCNKRDDTCYCNKGYIGDPKVG  
ELPCGGKCASTAYCDSASNTCKCKKGLVGDPHVRCGKPCDNKCRKNAFCNGNNKQCNPGF  
VGDPYEGCDRPCGGKCKTNAYCDEHTNTCKCNKGYIGDPLKCKFEPSVFQFVRRAYTVSESA  
GSVDIEVARTSGSEGSYTVSWEANDGSARQPSDYVNGQGTVNFKTNEKTEKITIKIVNDQRNV  
VALVELTPIVIPLHKS SVS VTS DSSYSVDLVPAAHADQTRDVTVTPTNVFVSKDIGYSTEVV  
FYHVEDLVARTNVATVQLTNVSVIQDTSVTKDHVPVST

>Py\_ec6

MTYSVSESAGTVSFQLSRTGGLFGSVTVSWSTHDGTARYPSDFSRNSGVATFGNGQSTTTFSIG  
VVNDQVYESNESFTVTLVAVSSTNVVIGTRREATVTITNDDAPCGGKCGPNARCDLTTQTCI

CNQGYYRRFHGSTCQLPCGGPCGPNERCDSVTNQCVCIERFYFKFRGSCVIPCGGPCGPNAQCD  
RVSNQVCNTGYIRFQRACTLPCGGKCPNSNSVCSSSDNRCHCNHGFQGDOPYHDGCHLRSVVE  
FGQLIYTVSEAGTLSLQLRRTGGLFGSVTVSWSTQNGNANYPSDFSDNSGVATFGNGQSTTT  
FTIGIVNDQTYESPEAFKVTLSVSQGSNTNIVVIGERRVATVTIISDDPPCGGPCGLNARCDVHS  
QKCVCIEGYTLYDGSCQLPCGGPCGQNAVCNQATNQCVCNTGYFLYHGSCALPCNGACVYN  
AYCDKGSNTCKCNHGLVGDPTKKCGIPCDGRCGSFPHSHCDHSTNRCACDTGYAGNPYGSV  
GCVCNGGHSGGGGGDSYVGGSSGGSFHGGSTGGSYAGSSTGDSYTGSSSGGSFHGSSSGGG  
YQPAHVGDY

>Py\_ecX

PGVVVIASPTYSVVENGVVVITVTRTGSTYAAVTVKWESRDITALQGSYIGKYGYIYFASG  
QTSETISIEITVDLIYEKDETFVSLTHVTAGAVLGNIFQITIVTIKNDDPPCGGPCPKPFSRCDVPS  
QRCVCIKGYIPNSYGGCSLPCGGKCCANAYCDATDNRCRCRTGYIGIGTWKCSKPCDAACKS  
YAYCAKDNRCYCSKGYYGSPYKGCCHLPCYNLCKANTACDLSNHRCYCKRGYYGNPLKGC  
TPGSFSFTKSVYTVKENVGLVHVTIHRKSSSQGVSVYWKTVESAKRVSDFGDTGGILYFAS  
GEIEKTITIHILDDKVYETESFTVSLTLVSAGGVLGQVVTATITIQDDDDTCGGPCGHYAHCDL  
RIHKCVCDKGYLLDSYHGGCVPPCGGRCCNNAYCDRGDNTCKCKPGYLGLGTVACYKPCQ  
GACVINAECGPDNKCCKKGYYGPNPYVECTLPCRAQCKRNARCDISSQRCECAHGFYGDPT  
VGCDKASTFVFAKPSYQVNEDAGTITVTVNRIGSTYGSISVSWVTKDLSAGHPHDFLNSYGLV  
FFAHGVESRTITIYLFVDKVYEQDENFQIVLTKVTPGGVLGGLTATTVTILNDDKPCGGPCGIN  
AYCDKPTQKCFHVVENVAPMHTVAPRTTATVTEATSEPQHRNVTVIPCNRACKDYAFCGKD  
NKCHCKTGYYGNPYQTCHLPCHGQCKQNSKCNTTTHQCVCLPGFFGDGKVGCTKPSVFIIAQ  
SSYAVKESVNVLVVNVNRIGSSSGSVKVTWKTDLTAESGHDYVNTGGVLYFGDKETSKDISI  
HIIDDKFYEADEQFVITLVEVTQGGVIGLQYKATVTIENDDEPCGGPCGINAFCDKPSQKCLCL  
KGFVKWNGIRVVDIARPTHTLTVTTRLTNVSVTTTTQVMPTTEDVYALVEDIPEDMGKLPVA  
IMEVLAEVAVTKLRPTVDIKLHR

>Py\_ec12

MFHSIPTLGFCTLCVLSLFGTTQGTYPICCSGSTLINRRCVCNPGYHGD SAHRCVEPCWKK  
CKANTICNKNTFKCSCKPGFVGNPYGGCILKATFQFARSSYVVKESAGVVKLQVDRISGGLH  
KVIMYWKSTSITARLNSDYRGASGSVTFGVGEKWKFIQIPIVNDQIYERIEFKVTLTSASAGG  
AIGTRSVTTVTITDDDLPCGGKCKNYRFSVCNEATNKVCIKNYYGDPYHGGCRCGGGGGY
